# Supplementary material
Source: PubMed Central journal article supplement (PMC3887557)

**Supplemental Figure 1. PI3K/Akt-dependent BAFF-R signaling.** (A) Western blots of protein lysates from freshly-isolated *Pten*<sup>+/+</sup>*Baff*<sup>+/+</sup>*Cd19*<sup>Cre</sup>, *Pten*<sup>L/L</sup>*Baff*<sup>+/+</sup>*Cd19*<sup>Cre</sup>, *Pten*<sup>+/+</sup>*Baff*<sup>-/-</sup>*Cd19*<sup>Cre</sup>, or *Pten*<sup>L/L</sup>*Baff*<sup>-/-</sup>*Cd19*<sup>Cre</sup> splenic B cells probed with anti-pAkt1 (S473) antibodies or anti-actin antibodies as a loading control. (B) *Pten*<sup>+/+</sup>*Cd19*<sup>Cre</sup> splenic B cells were cultured in medium or with 25 ng/mL BAFF in the presence or absence of IC87114, and cell viability was assessed by flow cytometry.

**Supplemental Figure 2. Splenic architecture in naïve and immunized mice.** (A) Fluorescent imaging of follicles from *Pten*<sup>+/+</sup>*Baff*<sup>+/+</sup>*Cd19*<sup>Cre</sup>, *Pten*<sup>L/L</sup>*Baff*<sup>+/+</sup>*Cd19*<sup>Cre</sup>, *Pten*<sup>+/+</sup>*Baff*<sup>-/-</sup>*Cd19*<sup>Cre</sup>, and *Pten*<sup>L/L</sup>*Baff*<sup>-/-</sup>*Cd19*<sup>Cre</sup> mice in frozen spleen sections stained with antibodies to CD3, Moma-1, and B220. Top row shows magnification with a 5x objective; bottom row shows 10x magnifications. Data are representative of n=5-6 mice per group. (B) Fluorescent imaging of splenic GC B cells 14 days post-immunization in frozen sections stained with antibody to peanut agglutinin (PNA) and B220. All data are representative of 3 independent experiments with a total of n=12-15 mice per group. Magnification shown is with a 10x objective.

**Figure S1, Related to Figure 4**

**A**

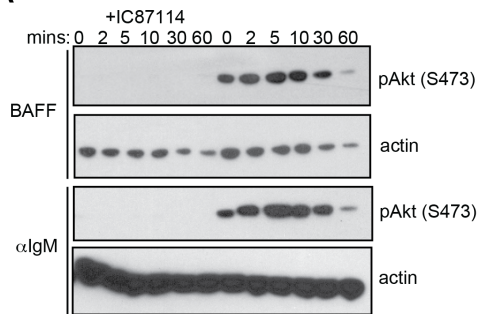

**B**

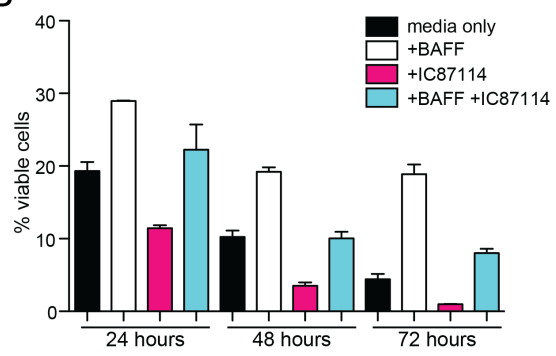

## Figure S2, Related to Figure 3

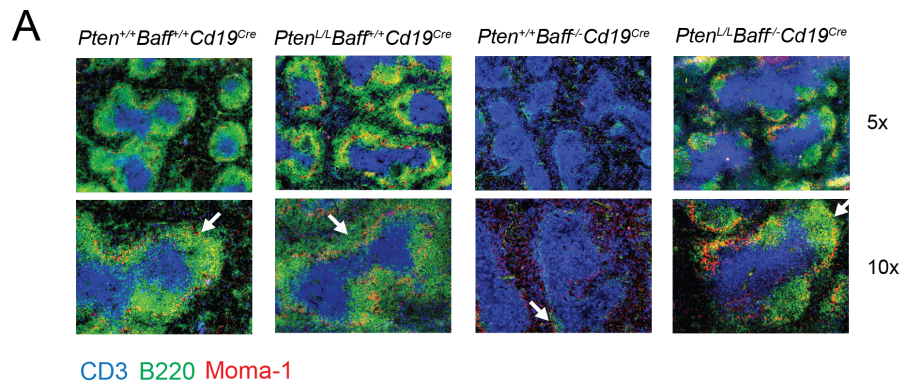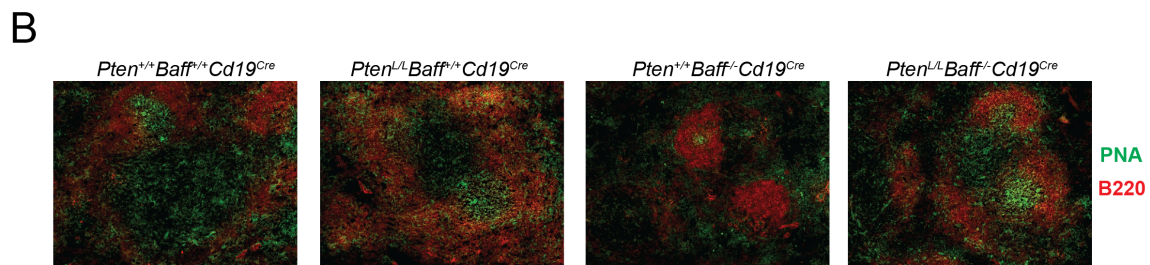

Supplement: NIHMS540053-supplement-01.pdf [file NIHMS540053-supplement-01.pdf]
